# Supplementary material for: Regulation of the Photon Spectrum on Growth and Nutritional Attributes of Baby-Leaf Lettuce at Harvest and during Postharvest Storage
Source: PubMed Central journal article supplement (PMC8000317; doi:10.3390/plants10030549), 2021-03-14

### Supplementary material

**Table S1.** Total phenolic content, total anthocyanin content, and antiradical activity of 'Rouxai' baby-leaf lettuce plants grown under different lighting treatments on harvest day and during postharvest (PH) storage in darkness at 5 °C.

| Radiation treatments | TPC, mg g <sup>-1</sup> DW | TAC, mg g <sup>-1</sup> DW | DPPH, μmol g <sup>-1</sup> DW |
|----------------------|----------------------------|----------------------------|-------------------------------|
| Harvest day          |                            |                            |                               |
| WW                   | 30.95 <sup>b</sup>         | 4.21 <sup>c</sup>          | 286.40 <sup>b</sup>           |
| +WW50                | 31.82 <sup>b</sup>         | 5.50 <sup>b</sup>          | 300.57 <sup>b</sup>           |
| +UV30                | 31.20 <sup>b</sup>         | 5.92 <sup>b</sup>          | 309.22 <sup>ab</sup>          |
| +B50                 | 38.65 <sup>a</sup>         | 8.21 <sup>a</sup>          | 328.37 <sup>ab</sup>          |
| +G50                 | 32.53 <sup>b</sup>         | 5.29 <sup>bc</sup>         | 369.76 <sup>a</sup>           |
| +R50                 | 33.91 <sup>b</sup>         | 4.72 <sup>bc</sup>         | 332.95 <sup>ab</sup>          |
| 1-day PH             |                            |                            |                               |
| WW                   | 29.02 <sup>b</sup>         | 3.27 <sup>c</sup>          | 297.35 <sup>c</sup>           |
| +WW50                | 32.15 <sup>ab</sup>        | 4.73 <sup>bc</sup>         | 338.58 <sup>bc</sup>          |
| +UV30                | 33.53 <sup>ab</sup>        | 5.84 <sup>b</sup>          | 326.15 <sup>bc</sup>          |
| +B50                 | 35.10 <sup>a</sup>         | 8.57 <sup>a</sup>          | 411.52 <sup>a</sup>           |
| +G50                 | 35.86 <sup>a</sup>         | 5.04 <sup>b</sup>          | 340.05 <sup>bc</sup>          |
| +R50                 | 33.23 <sup>ab</sup>        | 5.22 <sup>b</sup>          | 378.49 <sup>ab</sup>          |
| 3-days PH            |                            |                            |                               |
| WW                   | 25.06 <sup>c</sup>         | 3.09 <sup>b</sup>          | 244.45 <sup>b</sup>           |
| +WW50                | 30.72 <sup>b</sup>         | 5.32 <sup>b</sup>          | 289.32 <sup>b</sup>           |
| +UV30                | 28.66 <sup>bc</sup>        | 5.14 <sup>b</sup>          | 263.56 <sup>b</sup>           |
| +B50                 | 32.74 <sup>ab</sup>        | 8.87 <sup>a</sup>          | 356.31 <sup>a</sup>           |
| +G50                 | 35.93 <sup>a</sup>         | 5.48 <sup>b</sup>          | 367.89 <sup>a</sup>           |
| +R50                 | 33.30 <sup>ab</sup>        | 5.01 <sup>b</sup>          | 372.33 <sup>a</sup>           |
| 5-days PH            |                            |                            |                               |
| WW                   | 19.63 <sup>b</sup>         | 3.10 <sup>c</sup>          | 237.45 <sup>ab</sup>          |
| +WW50                | 19.87 <sup>b</sup>         | 4.65 <sup>bc</sup>         | 197.47 <sup>ab</sup>          |
| +UV30                | 23.81 <sup>ab</sup>        | 5.95 <sup>ab</sup>         | 191.76 <sup>b</sup>           |
| +B50                 | 30.72 <sup>a</sup>         | 7.41 <sup>a</sup>          | 296.13 <sup>ab</sup>          |
| +G50                 | 28.01 <sup>ab</sup>        | 5.95 <sup>ab</sup>         | 292.29 <sup>ab</sup>          |
| +R50                 | 31.11 <sup>a</sup>         | 5.68 <sup>ab</sup>         | 305.76 <sup>a</sup>           |
| 7-days PH            |                            |                            |                               |
| WW                   | 15.82 <sup>b</sup>         | 2.24 <sup>b</sup>          | 202.73 <sup>a</sup>           |
| +WW50                | 22.38 <sup>ab</sup>        | 4.39 <sup>a</sup>          | 255.15 <sup>a</sup>           |
| +UV30                | 18.52 <sup>ab</sup>        | 3.85 <sup>ab</sup>         | 201.78 <sup>a</sup>           |
| +B50                 | 21.69 <sup>ab</sup>        | 5.03 <sup>a</sup>          | 244.83 <sup>a</sup>           |
| +G50                 | 22.33 <sup>ab</sup>        | 4.14 <sup>a</sup>          | 250.05 <sup>a</sup>           |
| +R50                 | 25.94 <sup>a</sup>         | 4.74 <sup>a</sup>          | 280.68 <sup>a</sup>           |

TPC – total phenolic content; TAC – total anthocyanin content; DPPH – 2,2-Diphenyl-1-picrylhydrazyl free radical scavenging activity; 1-day PH to 7-days PH – number of days after the harvest. Plants were grown under six lighting treatments of 200 μmol m<sup>-2</sup> s<sup>-1</sup> from warm-white (WW; peak = 639 nm) LEDs (treatment WW; control) without or with an additional 30 μmol m<sup>-2</sup> s<sup>-1</sup> of UV-A (peak = 385 nm) or 50 μmol m<sup>-2</sup> s<sup>-1</sup> of WW, blue (B; peak = 449 nm), green (G; peak = 526 nm) or red (R; peak = 664 nm) light from LEDs (+WW50, +B50, +G50, and +R50, respectively). Data are presented as the mean of two replications with three randomly selected plants and three analytical measurements per

sample. Means with different letters are significantly different from the control treatment at the  $\alpha < 0.05$  level by Tukey's honestly significant difference test.

**Table S2.** Coefficients for linear regression equations presented in Figure 2, in the form of  $y = y_0 + ax$ , and their correlation coefficients ( $R^2$ ).

| Lighting treatments | TPC   |      |       | TAC   |       |       | DPPH  |     |       |
|---------------------|-------|------|-------|-------|-------|-------|-------|-----|-------|
|                     | $y_0$ | $a$  | $R^2$ | $y_0$ | $a$   | $R^2$ | $y_0$ | $a$ | $R^2$ |
| Control             | 31.2  | -2.2 | 0.996 | 3.88  | -0.22 | 0.802 | 295   | -13 | 0.916 |
| +WW50               | 33.0  | -1.8 | 0.757 | 5.31  | -0.12 | 0.555 | 319   | -13 | 0.521 |
| +UV30               | 33.6  | -2.0 | 0.919 | 6.07  | -0.23 | 0.530 | 322   | -20 | 0.862 |
| +B50                | 38.6  | -2.1 | 0.915 | 9.03  | -0.44 | 0.665 | 382   | -17 | 0.617 |
| +G50                | 36.3  | -1.7 | 0.684 | 5.44  | -0.08 | 0.121 | 376   | -16 | 0.792 |
| +R50                | 34.8  | -1.0 | 0.804 | 5.01  | 0.02  | 0.020 | 369   | -11 | 0.544 |

TPC – total phenolic content; TAC – total anthocyanin content; DPPH – 2,2-Diphenyl-1-picrylhydrazyl free radical scavenging activity. Lighting treatments consisted of a photon flux density of  $200 \mu\text{mol m}^{-2} \text{s}^{-1}$  from warm-white (WW) LEDs (control) without or with an additional  $30 \mu\text{mol m}^{-2} \text{s}^{-1}$  of UV-A (+UV30) or  $50 \mu\text{mol m}^{-2} \text{s}^{-1}$  of WW, blue (B), green (G), or red (R) light (+WW50, +B50, +G50, or +R50, respectively) for  $18 \text{ h d}^{-1}$ .

**Table S3.** Correlation matrix (Pearson) between biometric and biochemical measurements of baby leaf lettuce.

| Variables | FW           | DW           | LL            | LW           | SPAD         | DPPH         | TAC           | TPC           |
|-----------|--------------|--------------|---------------|--------------|--------------|--------------|---------------|---------------|
| FW        | <b>1</b>     | <b>0.821</b> | <b>0.562</b>  | <b>0.839</b> | 0.145        | <b>0.337</b> | -0.076        | -0.090        |
| DW        | <b>0.821</b> | <b>1</b>     | <b>0.460</b>  | <b>0.710</b> | 0.176        | <b>0.403</b> | -0.069        | -0.074        |
| LL        | <b>0.562</b> | <b>0.460</b> | <b>1</b>      | <b>0.741</b> | 0.083        | 0.087        | <b>-0.265</b> | <b>-0.294</b> |
| LW        | <b>0.839</b> | <b>0.710</b> | <b>0.741</b>  | <b>1</b>     | <b>0.194</b> | <b>0.210</b> | -0.064        | -0.130        |
| SPAD      | 0.145        | 0.176        | 0.083         | <b>0.194</b> | <b>1</b>     | <b>0.221</b> | <b>0.601</b>  | <b>0.493</b>  |
| DPPH      | <b>0.337</b> | <b>0.403</b> | 0.087         | <b>0.210</b> | <b>0.221</b> | <b>1</b>     | 0.154         | <b>0.356</b>  |
| TAC       | -0.076       | -0.069       | <b>-0.265</b> | -0.064       | <b>0.601</b> | 0.154        | <b>1</b>      | <b>0.699</b>  |
| TPC       | -0.090       | -0.074       | <b>-0.294</b> | -0.130       | <b>0.493</b> | <b>0.356</b> | <b>0.699</b>  | <b>1</b>      |

Values in bold are different from 0 with a significance level  $\alpha = 0.05$ . FW – shoot fresh weight; DW – shoot dry weight; LL – leaf length; LW – leaf width; SPAD – relative chlorophyll content (index); DPPH – 2,2-Diphenyl-1-picrylhydrazyl free radical scavenging activity; TAC – total anthocyanin content; TPC – total phenolic content.

**Figure S1.** Scree plot of biometric and biochemical measurements of baby-leaf lettuce grown under different lighting treatments.

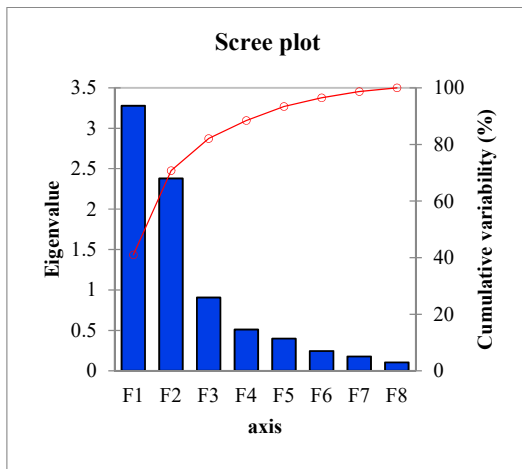

Supplement: plants-10-00549-s001.pdf [file plants-10-00549-s001.pdf]
